# Supplementary material for: Ice-templating synthesis of macroporous noble metal/3D-graphene nanocomposites: their fluorescence lifetimes and catalytic study
Source: Royal Society of Chemistry journal article supplement (doi:10.1039/c7nj00128b), 2017-01-01
Supplement: c7nj00128b1.pdf [file c7nj00128b1.pdf]

## Supplementary Information

### **Ice-templating synthesis of macroporous noble metals /3D-graphene nanocomposites: their fluorescence lifetime and catalytic study**

Prasanta Kumar Sahoo<sup>a,b\*</sup>, Bharati Panigrahy<sup>c</sup>, Dinbandhu Thakur<sup>b</sup> and Dharendra Bahadur<sup>b\*</sup>

*<sup>a</sup>Department of Metallurgical Engineering and Materials Science, Indian Institute of Technology Bombay, Powai, Mumbai-400076, India*

*<sup>b</sup>Centre for Nano Science and Nano Technology, Siksha 'O' Anusandhan University, Bhubaneswar 751030, Odisha*

*<sup>c</sup>Solid State and Structural Chemistry Unit, Indian Institute of Science, Bangalore, 560012, India*

#### **\*Corresponding Authors:**

1. Prof. Dharendra Bahadur, FRSC  
Dept. of Metallurgical Engineering and Materials Science  
Indian Institute of Technology Bombay  
Powai, Mumbai-400076, India  
Ph: 91-22-25767632, Fax: 91-22-25723480  
Email: dhirenb@iitb.ac.in

2. Prof. Prasanta Kumar Sahoo  
Centre for Nano Science and Nano Technology,  
Siksha 'O' Anusandhan University,  
Bhubaneswar 751030, Odisha, India  
Ph: 91-67-42350181, Fax: 91-67-42351880  
Email: prasantakumarsahoo@soauniversity.ac.in

**Table S1** Comparison of  $2\theta$  values of (111) plane of Pt, Pd and Au in NM/3D-graphene nanocomposites with Joint Committee on Powder Diffraction Standards (JCPDS) data.

| Planes                       | $2\theta$ (Degree) |
|------------------------------|--------------------|
| Pt (111) (Pt/3D-graphene)    | 39.6               |
| Pt (111) (JCPDS 00-004-0802) | 39.8               |
| Pd (111) (Pd/3D-graphene)    | 39.7               |
| Pd (111) (JCPDS 00-005-0681) | 40.1               |
| Au (111) Au/3D-graphene      | 38.1               |
| Au (111) (JCPDS 00-004-0784) | 38.2               |

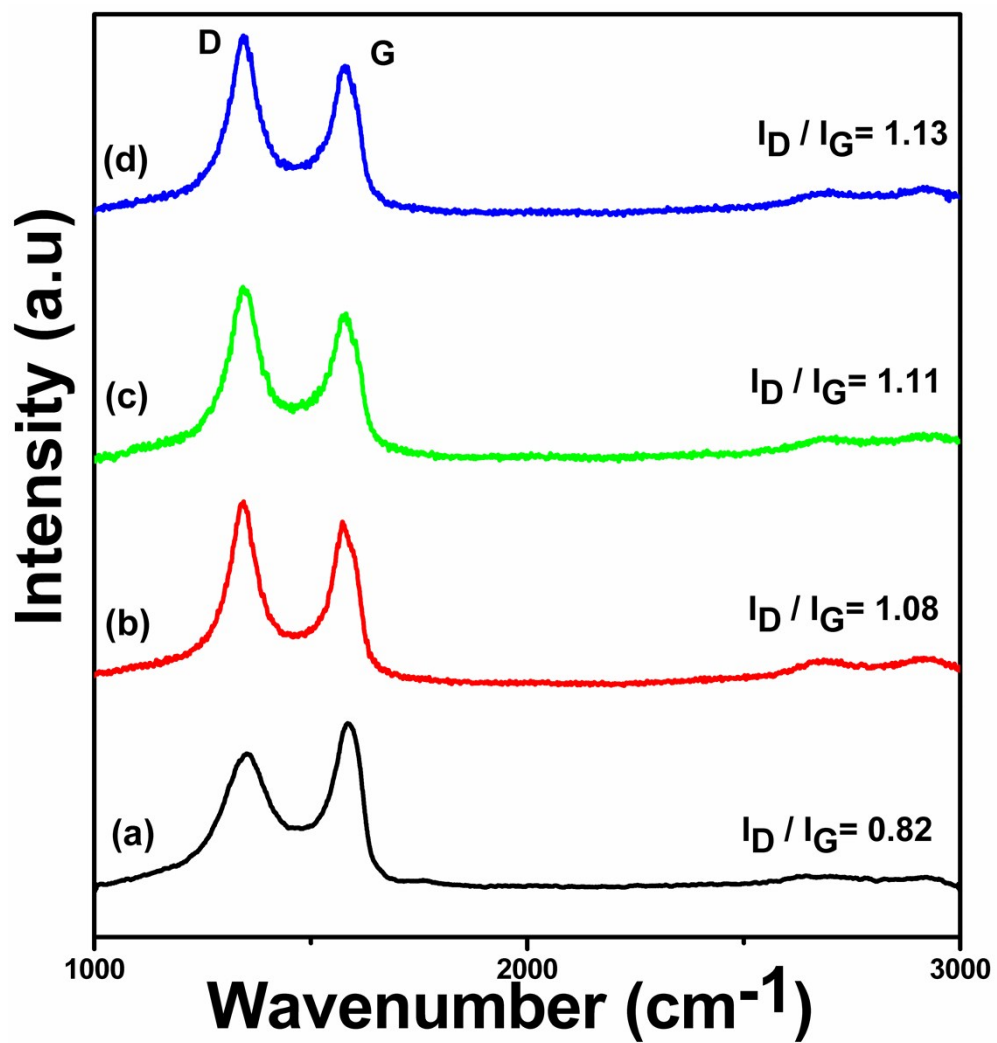

**Fig.S1** Raman spectra of (a) GO, (b) Au/3D-graphene, (c) Pd/3D-graphene, and (d) Pt/3D-graphene nanocomposites.

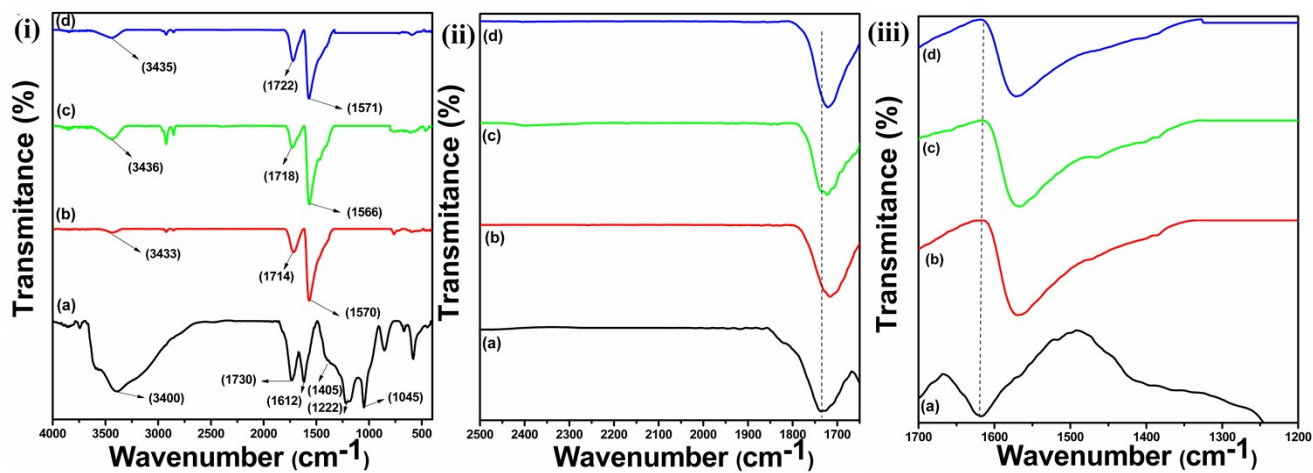

**Fig.S2** (i) FTIR spectra of (a) GO, (b) Au/3D-graphene, (c) Pd/3D-graphene, and (d) Pt/3D-graphene nanocomposites; (ii) The C=O stretching vibration and (iii) O-H deformation vibration of (a) GO, (b) Au/3D-graphene, (c) Pd/3D-graphene, and (d) Pt/3D-graphene nanocomposites.

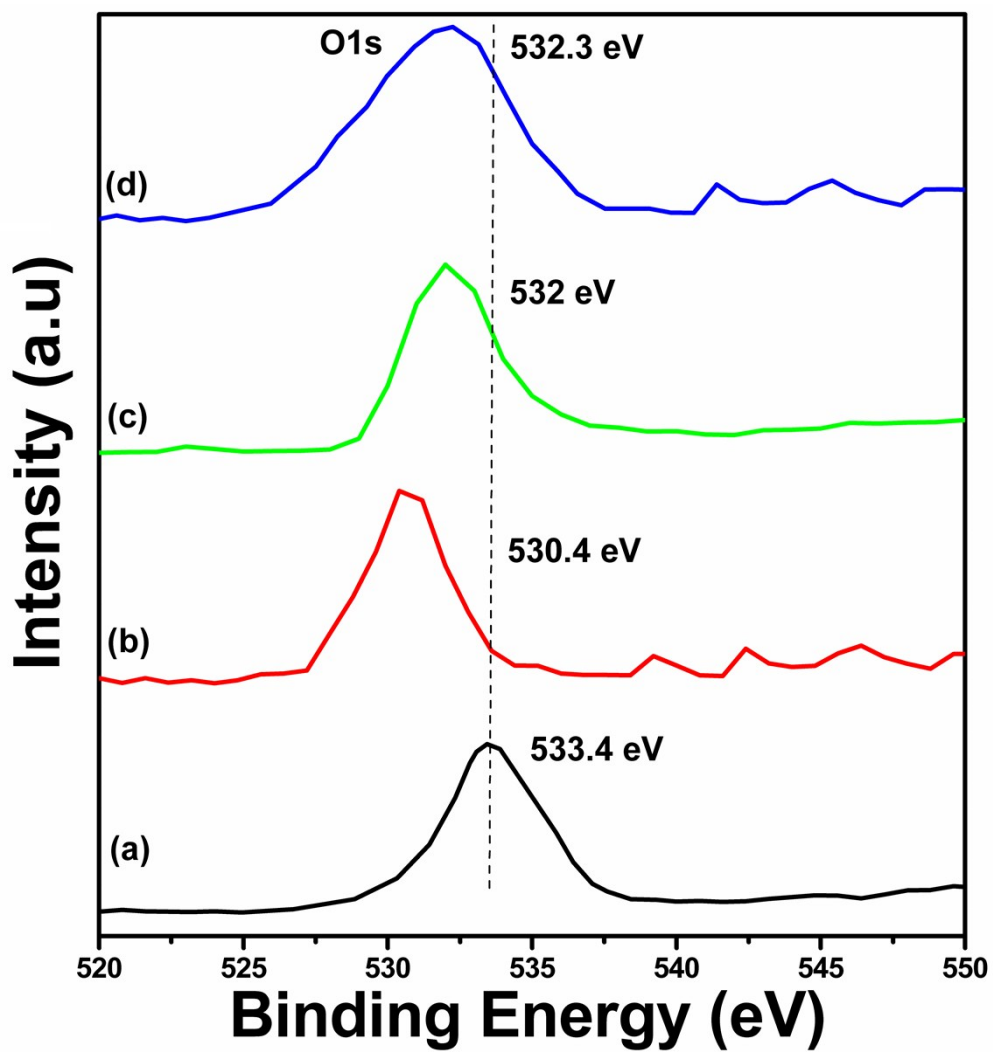

**Fig.S3** O 1s XPS spectra of (a) GO, (b) Au/3D-graphene, (c) Pd/3D-graphene, and (d) Pt/3D-graphene nanocomposites.

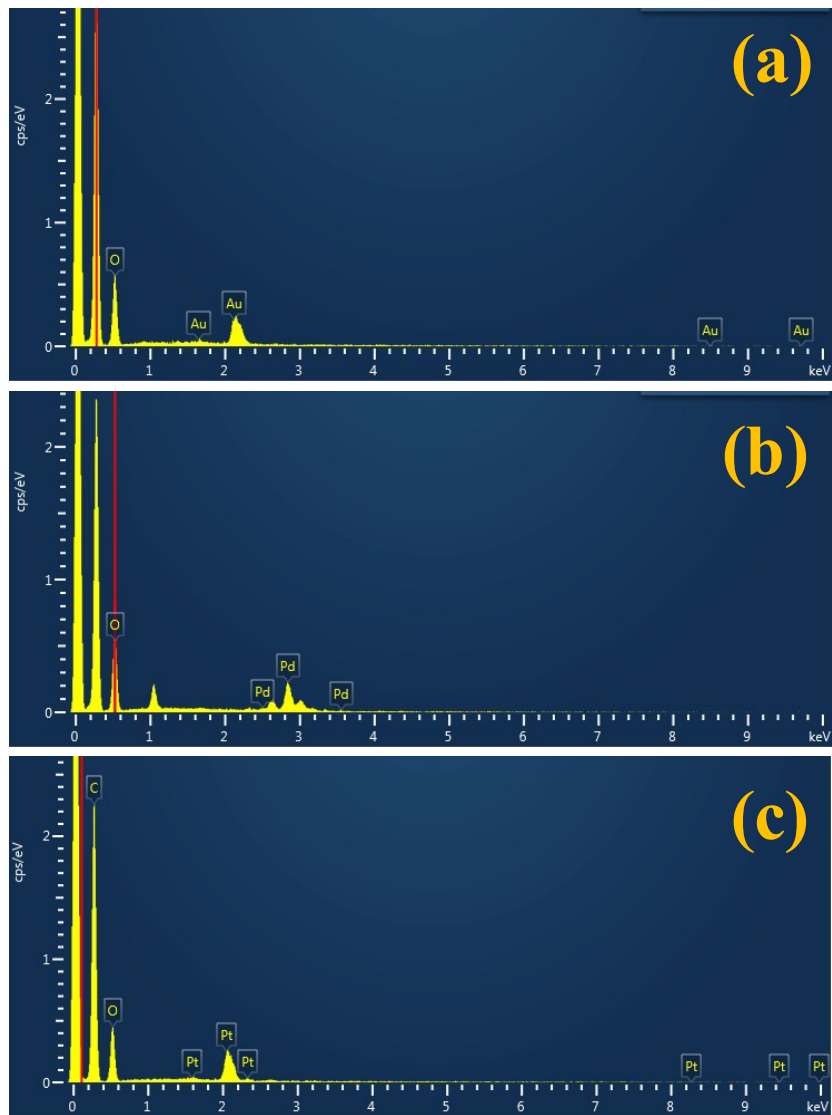

**Fig.S4** Energy dispersive X-ray spectroscopy (EDS) spectra of (a) Au/3D-graphene (b) Pd/3D-graphene and Pt/3D-graphene nanocomposites.

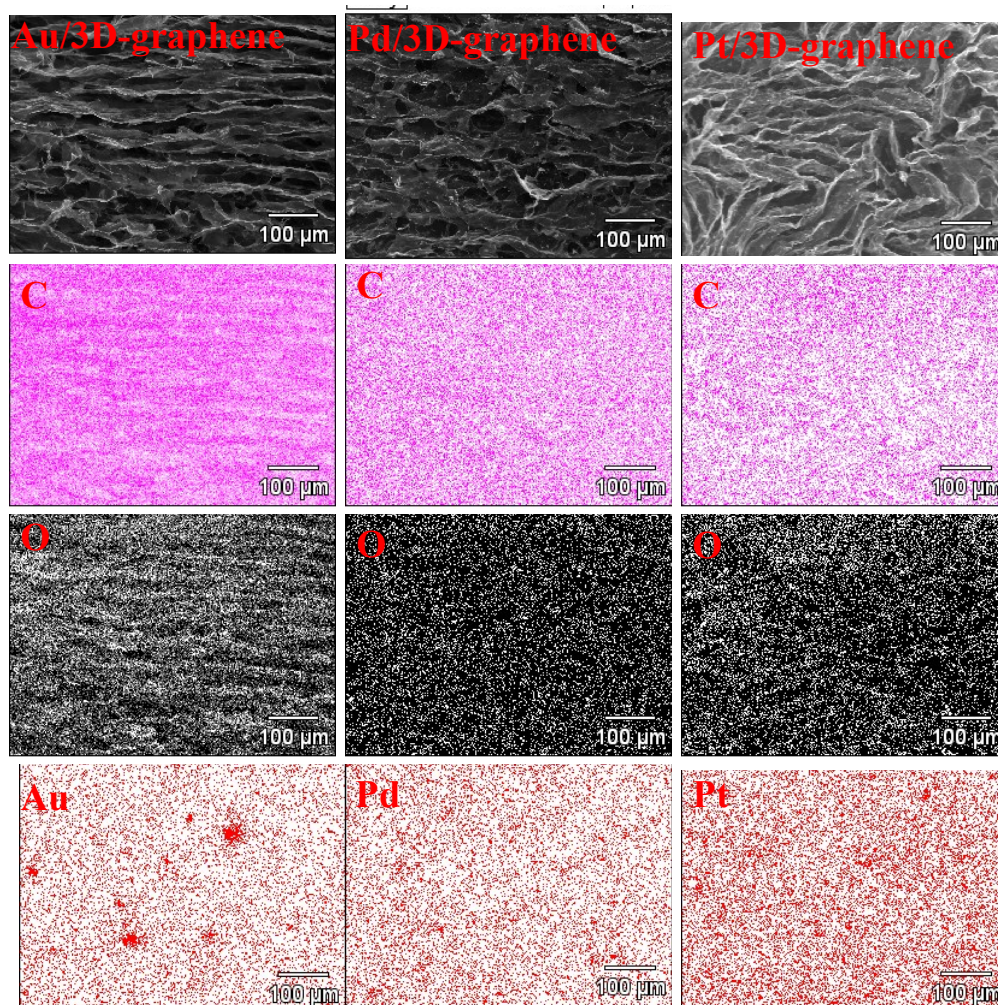

**Fig.S5 EDS elemental mapping images of Au/3D-graphene, Pd/3D-graphene and Pt/3D-graphene nanocomposites.**

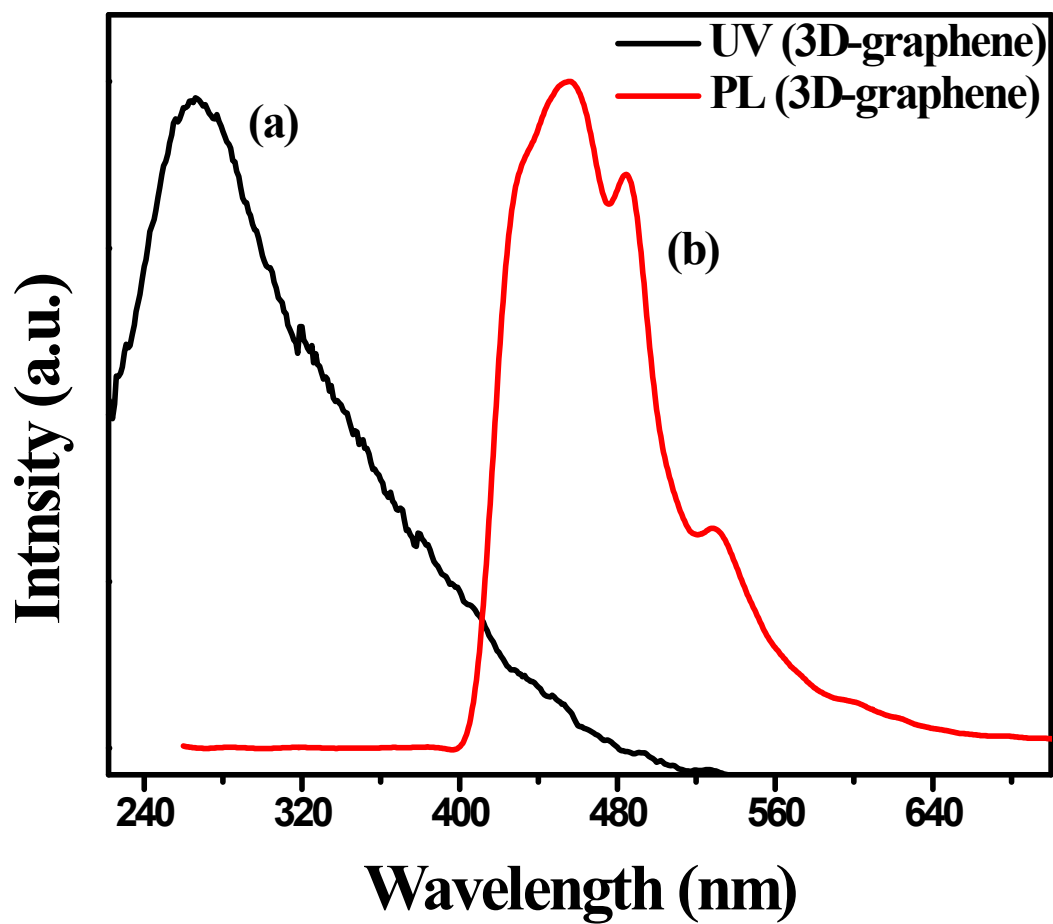

**Fig.S6** (a) UV-vis absorption and (b) photoluminescence spectra of GO sheets.



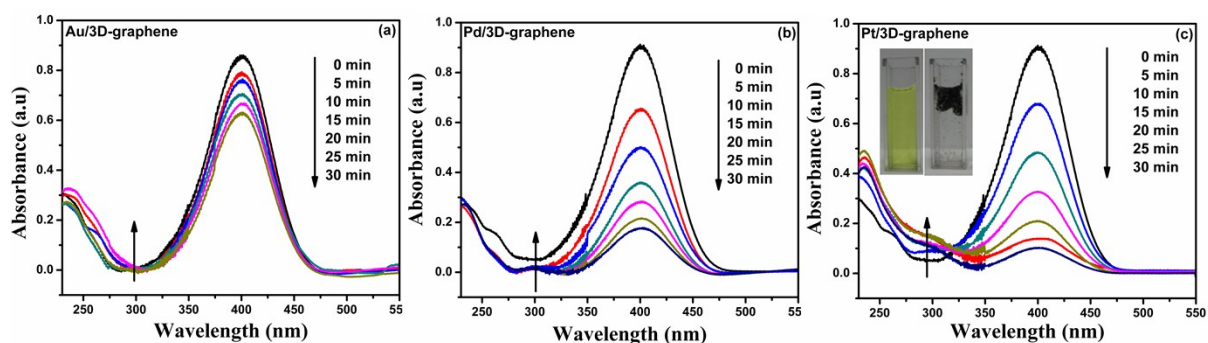

**Fig.S7** UV-vis absorption spectra of 4-NP reduction by  $\text{NaBH}_4$  in the presence of (a) Au/3D-graphene (b) Pd/3D-graphene, and (c) Pt/3D-graphene nanocomposites.

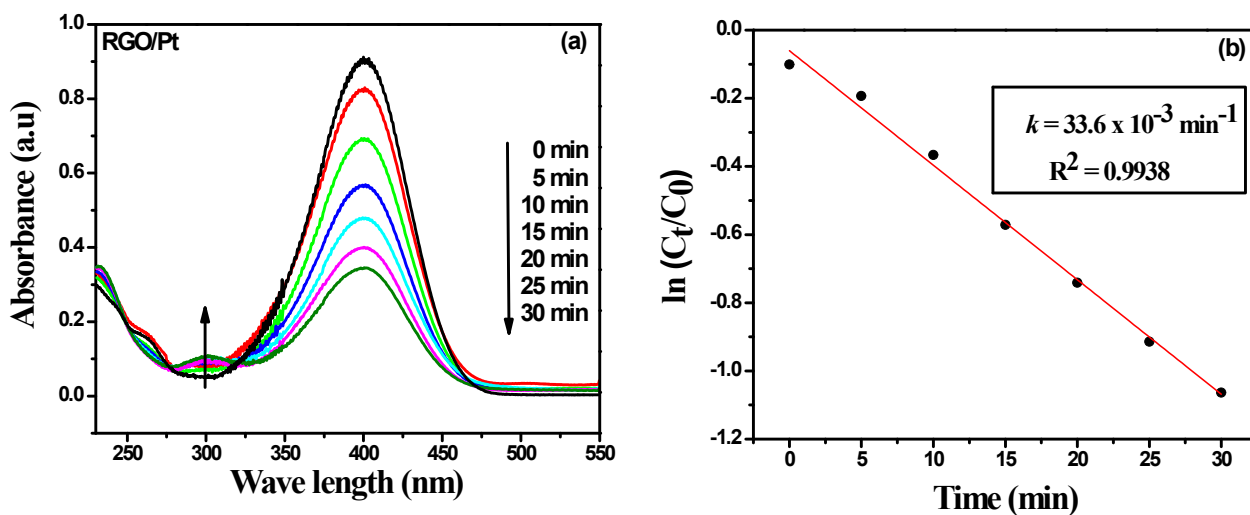

**Fig.S8** (a) UV-vis absorption spectra of the reduction of 4-NP by  $\text{NaBH}_4$  in the presence of RGO/Pt nanocomposite. (b) Plot of  $\ln C_t/C_0$  versus time for the kinetic study of the reduction reaction of 4-NP in the presence of RGO/Pt nanocomposite.

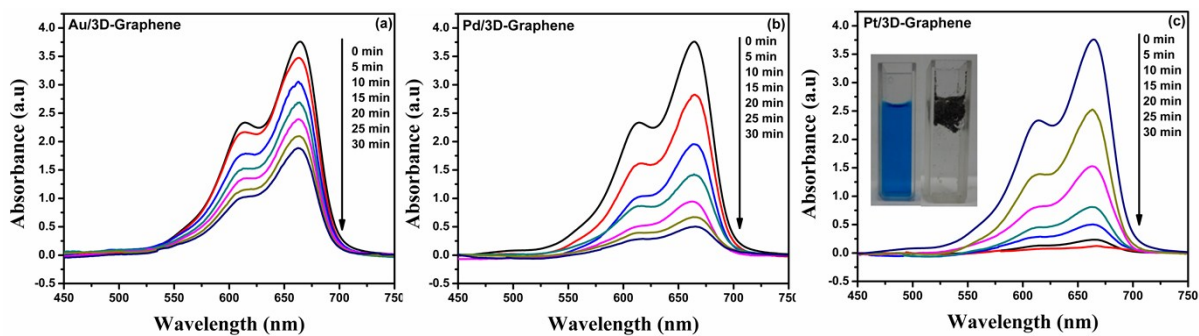

**Fig.S9** UV-vis absorption spectra of MB reduction by  $\text{NaBH}_4$  in the presence of (a) Au/3D-graphene (b) Pd/3D-graphene, and (c) Pt/3D-graphene nanocomposites.

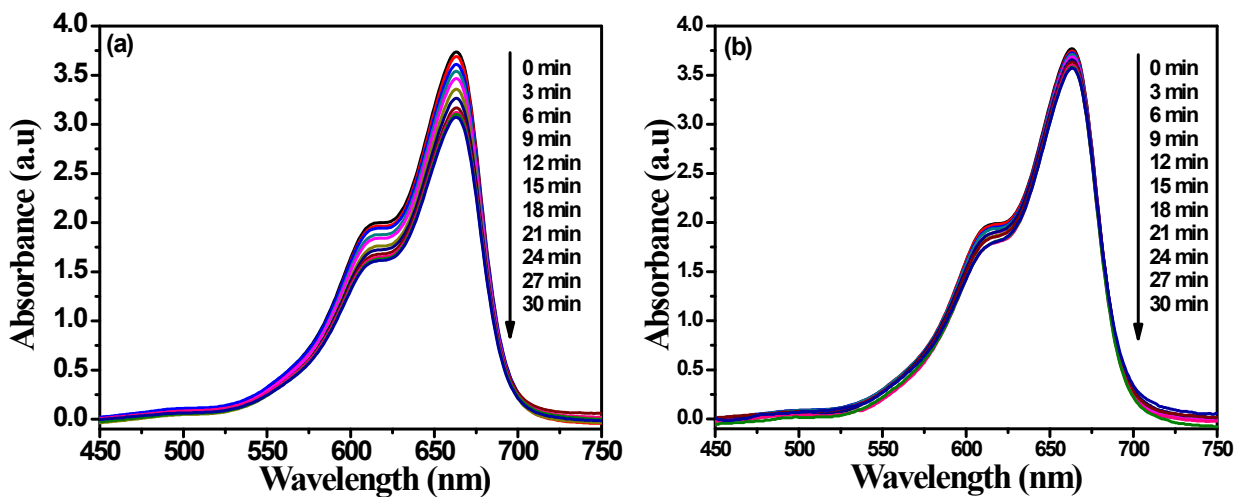

**Fig. S10** UV-vis absorption spectrum of MB in presence of (a) Pt/3D-graphene and (b) RGO/Pt nanocomposites as catalysts without  $\text{NaBH}_4$ .

**Table S2** Comparison of the catalytic performances of the Pt/3D-graphene nanocomposite for the reduction of 4-NP with other reported catalysts.

|             | <b>Catalyst<sup>a</sup></b> | <b>Rate constant<br/>(<math>\times 10^{-3} \cdot \text{min}^{-1}</math>)</b> | <b>Ref.</b> |
|-------------|-----------------------------|------------------------------------------------------------------------------|-------------|
| <b>4-NP</b> | Dendritic Pt                | 45                                                                           | 1           |
|             | Pt nanoflowers              | 42                                                                           | 2           |
|             | Pt/ $\gamma$ -alumina       | 32                                                                           | 3           |
|             | SiO <sub>2</sub> /Pt        | 44                                                                           | 4           |
|             | RGO/Pt                      | 13.7                                                                         | 5           |
|             | Pt-NCs/RGO                  | 54.5                                                                         | 6           |
|             | RGO/Pt-Ni                   | 35.5                                                                         | 5           |
|             | Pt–Au pNDs/RGOs             | 3.8                                                                          | 7           |
|             | Pt/3D-graphene              | 75.3                                                                         | This work   |

<sup>a</sup>RGO: Reduced graphene oxide; NCs: nanocubes; pNDs: Porous nanodendrites.

## References:

- 1 J. Wang, X. B. Zhang, Z. L. Wang , L. M. Wang, W. Xing and X. Liu, *Nanoscale*, 2012, **4**, 1549-1552.
- 2 S. Mourdikoudis, T. Altantzis, L. M. Lix-Marzan, S. Bals, I. Pastoriza-Santos and J. Perez-Juste, *Cryst. Eng.Comm.*, 2016, **18**, 3422-3427.
- 3 A. Dandapat, D. Jana and G. De, *ACS Appl. Mater. Interfaces*, 2009, **1**, 833-840.
- 4 H. Guan, C. Chao, Y. Lu, H. Shang, Y. Zhao, S. Yuan and B. Zhang, *J. Chem. Sci.*, 2016, **128**, 1355-1365.
- 5 P. K. Sahoo, B. Panigrahy and D. Bahadur, *RSC Adv.*, 2014, **4**, 48563-48571.
- 6 F. Li, X. Gao, Q. Xue, S. Li, Y. Chen and J. M. Lee, *Nanotechnology*, 2015, **26**, 065603.
- 7 J.J. Lv, A.J. Wang, X. Ma, R.Y. Xiang, J.R. Chen and J.J. Feng, *J.Mater.Chem. A*, 2015, **3**, 290-296.
